# Supplementary material for: SOS-Independent Pyocin Production in P. aeruginosa Is Induced by XerC Recombinase Deficiency
Source: PubMed Central journal article supplement (PMC8609362; doi:10.1128/mbio.02893-21), 2021-11-23
Supplement: mbio.02893-21-sf002.pdf [file mbio.02893-21-sf002.pdf]

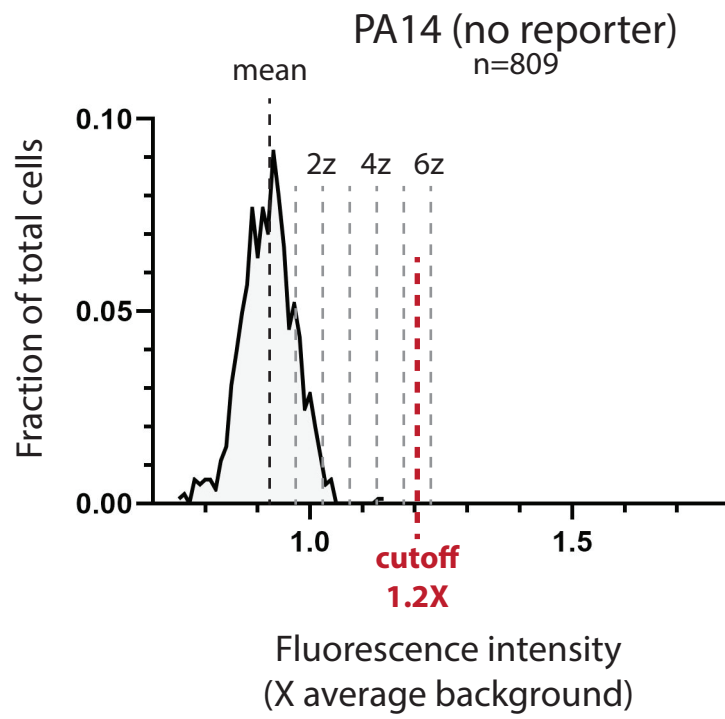

Figure S2
